# Supplementary material
Source: MDPI journal article supplement (https://www.mdpi.com/2073-4352/14/5/438)
Supplement: s1 [file s1]

# **Molecular simulations of unexplored Philippine plant constituents on the inhibition of the proinflammatory marker NF- $\kappa$ B p50 subunit**

Jasmine U. Ting <sup>1,\*</sup>, Maria Carmen S. Tan <sup>1</sup>, Vincent Antonio S. Ng <sup>1</sup>, Stephani Joy Y. Macalino <sup>1</sup>, Virgilio C. Linis <sup>2</sup> and Glenn G. Oyong <sup>3,\*</sup>

<sup>1</sup> Department of Chemistry, De La Salle University, 2401 Taft Avenue, Malate, Manila 0922, Philippines; maria.carmen.tan@dlsu.edu.ph (M.C.S.T.); vincent.ng@dlsu.edu.ph (V.A.S.N.); stephani.macalino@dlsu.edu.ph (S.J.Y.M.)

<sup>2</sup> School of Multidisciplinary Studies, De La Salle-College of Saint Benilde, 2544 Taft Avenue, Malate, Manila 0922, Philippines; virgilio.linis@benilde.edu.ph

<sup>3</sup> Department of Physics, De La Salle University, 2401 Taft Avenue, Malate, Manila 0922, Philippines; glenn.oyong@dlsu.edu.ph

\* Correspondence: jasmine.u.ting@outlook.com (J.U.T.); glenn.oyong@dlsu.edu.ph (G.G.O.)

## Table of Contents

|                                                                                                              |     |
|--------------------------------------------------------------------------------------------------------------|-----|
| <b>Table S1.</b> List of previously reported new or novel compounds from plants available in the Philippines | S2  |
| <b>Figure S1.</b> Binding interaction of p50 and Compound 11                                                 | S6  |
| <b>Figure S2.</b> Binding interaction of p50 and Compound 14                                                 | S7  |
| <b>Figure S3.</b> Binding interaction of p50 and Compound 16                                                 | S8  |
| <b>Figure S4.</b> Binding interaction of p50 and Compound 56                                                 | S9  |
| <b>Figure S5.</b> Binding interaction of p50 and Compound 58                                                 | S10 |
| <b>Figure S6.</b> Molecular simulation of p50- Compound 11 complex                                           | S11 |
| <b>Figure S7.</b> Molecular simulation of p50- Compound 14 complex                                           | S12 |
| <b>Figure S8.</b> Molecular simulation of p50- Compound 16 complex                                           | S13 |
| <b>Figure S9.</b> Molecular simulation of p50- Compound 56 complex                                           | S14 |
| <b>Figure S10.</b> Molecular simulation of p50- Compound 58 complex                                          | S15 |
| <b>Figure S11.</b> Amino acid residues with significant vibration motion during the simulation               | S16 |
| <b>Table S2.</b> Evolution of non-covalent bonding interaction between the protein and ligand in 10 ns       | S17 |
| <b>References</b>                                                                                            | S20 |

**Table S1.** List of previously reported new or novel compounds from plants available in the Philippines

| Compound                  | Name                                                                                                                                                            | CID      | Classification of the Compound | Plant                                                                                                                                                                                                | Family         | Part   | Ref  |
|---------------------------|-----------------------------------------------------------------------------------------------------------------------------------------------------------------|----------|--------------------------------|------------------------------------------------------------------------------------------------------------------------------------------------------------------------------------------------------|----------------|--------|------|
| <b>1</b> <sup>a,c</sup>   | 1 $\beta$ -acetoxy-4 $\alpha$ ,9 $\alpha$ -dihydroxy-6 $\beta$ -isobutyroxyprostatolide                                                                         | n/a      | Eudesmanolide sesquiterpene    | <i>Wollastonia dentata</i> (H.Lév. & Vaniot) Orchard<br>(syn. <i>Eclipta dentata</i> H.Lév. & Vaniot;<br><i>Melanthera prostrata</i> (Hemsl.) W.L. Wagner & H.Bob.; <i>Wedelia prostrata</i> Hemsl.) | Asteraceae     | Leaves | [15] |
| <b>2</b> <sup>a,c</sup>   | 1 $\beta$ -acetoxy-4 $\alpha$ ,9 $\alpha$ -dihydroxy-6 $\beta$ -methacryloxyprostatolide                                                                        | n/a      | Eudesmanolide sesquiterpene    | <i>W. dentata</i> (H.Lév. & Vaniot) Orchard                                                                                                                                                          | Asteraceae     | Leaves | [15] |
| <b>3</b> <sup>a,c</sup>   | 1 $\beta$ ,9 $\alpha$ -diacetoxy-4 $\alpha$ -hydroxy-6 $\beta$ -isobutyroxyprostatolide                                                                         | n/a      | Eudesmanolide sesquiterpene    | <i>W. dentata</i> (H.Lév. & Vaniot) Orchard                                                                                                                                                          | Asteraceae     | Leaves | [15] |
| <b>4</b> <sup>a,c</sup>   | 1 $\beta$ ,9 $\alpha$ -diacetoxy-4 $\alpha$ -hydroxy-6 $\beta$ -methacryloxyprostatolide                                                                        | n/a      | Eudesmanolide sesquiterpene    | <i>W. dentata</i> (H.Lév. & Vaniot) Orchard                                                                                                                                                          | Asteraceae     | Leaves | [15] |
| <b>5</b> <sup>a,b</sup>   | Spicatolide A                                                                                                                                                   | 44445367 | Germacranolides                | <i>Pseudelephantopus spicatus</i> (Juss. ex Aubl.) Rohr                                                                                                                                              | Asteraceae     | Leaves | [16] |
| <b>6</b> <sup>a,b</sup>   | Spicatolide B                                                                                                                                                   | n/a      | Germacranolides                | <i>P. spicatus</i> (Juss. ex Aubl.) Rohr                                                                                                                                                             | Asteraceae     | Leaves | [16] |
| <b>7</b> <sup>c</sup>     | Phytyl heptanoate                                                                                                                                               | n/a      | Diterpene                      | <i>Bidens pilosa</i> L.                                                                                                                                                                              | Asteraceae     | Leaves | [45] |
| <b>8</b> <sup>b</sup>     | azadirachtolide                                                                                                                                                 | n/a      | Tetranortriterpenoids          | <i>Azadirachta indica</i> A.Juss.                                                                                                                                                                    | Meliaceae      | Leaves | [17] |
| <b>9</b> <sup>b</sup>     | deoxyazadirachtolide                                                                                                                                            | n/a      | Tetranortriterpenoids          | <i>A. indica</i> A.Juss.                                                                                                                                                                             | Meliaceae      | Leaves | [17] |
| <b>10</b> <sup>b</sup>    | 22 $\beta$ -acetoxy-lantolic acid/ 22 $\beta$ -acetyl lantolic acid                                                                                             | n/a      | Triterpene                     | <i>Lantana camara</i> L.                                                                                                                                                                             | Verbenaceae    | Leaves | [44] |
| <b>11</b> <sup>a, b</sup> | eudesm-11-en-4 $\alpha$ -O- $\beta$ -D-3-seneciolyloxy-6-deoxyglucopyranoside                                                                                   | n/a      | Sesquiterpene glycosides       | <i>Pittosporum pentandrum</i> (Blanco) Merr.                                                                                                                                                         | Pittosporaceae | Leaves | [18] |
| <b>12</b> <sup>a, b</sup> | eudesm-11-en-4 $\alpha$ -O- $\beta$ -D-3-tigoyloxy-6-deoxyglucopyranoside                                                                                       | n/a      | Sesquiterpene glycosides       | <i>P. pentandrum</i> (Blanco) Merr.                                                                                                                                                                  | Pittosporaceae | Leaves | [18] |
| <b>13</b> <sup>a, b</sup> | $\alpha$ -pinene-7 $\beta$ -O- $\beta$ -D-2,6-diacetylglucopyranoside                                                                                           | n/a      | Acetylated pinene glucosides   | <i>Erigeron sumatrensis</i> Retz.<br>(syn. <i>Erigeron bonariensis</i> L.)                                                                                                                           | Asteraceae     | Leaves | [19] |
| <b>14</b> <sup>a, b</sup> | $\alpha$ -pinene-7 $\beta$ -O- $\beta$ -D-2-acetylglucopyranoside                                                                                               | n/a      | Acetylated pinene glucosides   | <i>E. sumatrensis</i> Retz.                                                                                                                                                                          | Asteraceae     | Leaves | [19] |
| <b>15</b> <sup>c</sup>    | (3R,3aR,5aS,5bR,8S,9S,11aR)-8-(hydroxymethyl)-3-isopropyl-3a,5a,5b,8,11a-pentamethyl-1H,2H,3H,4H,5H,6H,7H,7aH,9H,10H,11H,11bH,12H,13H-cyclopenta[a]chrysen-9-ol | n/a      | Triterpene                     | <i>Ficus pumila</i> L.                                                                                                                                                                               | Moraceae       | Leaves | [20] |

|                           |                                                                                                                                              |          |                                 |                                                                                                   |                 |         |      |
|---------------------------|----------------------------------------------------------------------------------------------------------------------------------------------|----------|---------------------------------|---------------------------------------------------------------------------------------------------|-----------------|---------|------|
| <b>16</b> <sup>a, c</sup> | (2aβ,3α,5aβ,6β,7α,8α)-6-[2-(3-furanyl)ethyl]-2a,3,4,5,5a,6,7,8,8a,8b-decahydro-2a,3-dihydroxy-6,7,8b-trimethyl-2H-naphtho[1-8-bc]furan-2-one | n/a      | Diterpene                       | <i>Tinospora crispa</i> (L.) Hook. f. & Thomson<br>(syn. <i>Tinospora rumphii</i> Boerl.)         | Menispremac-eae | Leaves  | [21] |
| <b>17</b> <sup>a, c</sup> | Methyl(1α,4αa,5α,6β,8α)-5-[2-(3-furan-3-ene-2-one)ethyl]-1,2,3,4,4a,5,6,7,8,8a-decahydro-1,2-dihydroxy-1-naphthalenecarboxylate              | n/a      | Diterpene                       | <i>T. crispa</i> (L.) Hook. f. & Thomson                                                          | Menispremac-eae | Leaves  | [21] |
| <b>18</b> <sup>c</sup>    | 2-[(4bR,6S)-6-(acetyloxy)-1,3,4,9-tetrahydroxy-4b,8,8-trimethyl-10-oxo-6,7-dihydro-5H-phenanthren-2-yl]-3-hydroxypropyl acetate              | n/a      | Diterpene                       | <i>Coleus scutellarioides</i> (L.) Benth.<br>(syn. <i>Plectranthus scutellarioides</i> (L.) R.Br. | Lamiaceae       | Leaves  | [22] |
| <b>19</b> <sup>c</sup>    | (4S,6R,6aS,9R,10S)-6,10-bis(acetyloxy)-3-(ethoxymethyl)-6a,9-dihydroxy-6,9-dimethyl-2-oxo-4H,5H,7H,8H,10H-naphtho[4a,4-b]furan-4-yl acetate  | n/a      | Sesquiterpene lactone           | <i>Pseudelephantopus spicatus</i> (Juss. ex Aubl.) Rohr                                           | Asteraceae      | Leaves  | [23] |
| <b>20</b> <sup>c</sup>    | (4S,5R)-4-[(1E,3S)-3,4-dihydroxybut-1-en-1-yl]-4-hydroxy-3,3,5-trimethylcyclohexan-1-one                                                     | n/a      | Ionone                          | <i>Alternanthera sessilis</i> (L.) DC.                                                            | Amaranthaceae   | Leaves  | [24] |
| <b>21</b> <sup>a, c</sup> | (4S,5R)-4-[(1E,3R)-3,4-dihydroxybut-1-en-1-yl]-4-hydroxy-3,3,5-trimethylcyclohexan-1-one                                                     | n/a      | Ionone                          | <i>A. sessilis</i> (L.) DC.                                                                       | Amaranthaceae   | Leaves  | [24] |
| <b>22</b> <sup>c</sup>    | Isovoucapenol A                                                                                                                              | n/a      | Cassane-type furanoditerpenoids | <i>Caesalpinia pulcherrima</i> (L.) Sw.                                                           | Fabaceae        | Leaves  | [25] |
| <b>23</b> <sup>c</sup>    | Isovoucapenol B                                                                                                                              | n/a      | Cassane-type furanoditerpenoids | <i>C. pulcherrima</i> (L.) Sw.                                                                    | Fabaceae        | Leaves  | [25] |
| <b>24</b> <sup>c</sup>    | Isovoucapenol C                                                                                                                              | n/a      | Cassane-type furanoditerpenoids | <i>C. pulcherrima</i> (L.) Sw.                                                                    | Fabaceae        | Leaves  | [25] |
| <b>25</b> <sup>c</sup>    | Isovoucapenol D                                                                                                                              | n/a      | Cassane-type furanoditerpenoids | <i>C. pulcherrima</i> (L.) Sw.                                                                    | Fabaceae        | Leaves  | [25] |
| <b>26</b> <sup>c</sup>    | Isovoucapenol E                                                                                                                              | n/a      | Cassane-type furanoditerpenoids | <i>C. pulcherrima</i> (L.) Sw.                                                                    | Fabaceae        | Leaves  | [26] |
| <b>27</b> <sup>c</sup>    | 16-hydroxycycloartenol-palmitic acid ester                                                                                                   | n/a      | Cycloartenol esters             | <i>Ixora coccinea</i> L.                                                                          | Rubiaceae       | Flowers | [27] |
| <b>28</b> <sup>c</sup>    | 16-hydroxycycloartenol-myristic acid ester                                                                                                   | n/a      | Cycloartenol esters             | <i>I. coccinea</i> L.                                                                             | Rubiaceae       | Flowers | [27] |
| <b>29</b> <sup>c</sup>    | 31-norlargerenol acetate                                                                                                                     | n/a      | Triterpenoid                    | <i>Lagerstroemia speciosa</i> (L.) Pers                                                           | Lythraceae      | Leaves  | [28] |
| <b>30</b> <sup>a, c</sup> | Lappaceolide A                                                                                                                               | 11622716 | Monoterpene lactones            | <i>Nephelium lappaceum</i> L.                                                                     | Sapindaceae     | Seeds   | [29] |
| <b>31</b> <sup>a, c</sup> | Lappaceolide B                                                                                                                               | 11572139 | Monoterpene lactones            | <i>N. lappaceum</i> L.                                                                            | Sapindaceae     | Seeds   | [29] |

|                           |                                                                                                                                               |          |                  |                                               |               |         |      |
|---------------------------|-----------------------------------------------------------------------------------------------------------------------------------------------|----------|------------------|-----------------------------------------------|---------------|---------|------|
| <b>32</b> <sup>a, c</sup> | (1S,4S,7S,11S)-4-hydroxy-7-methyl-2,10-dioxatricyclo[5.3.1.0 <sup>4,11</sup> ]undec-5-en-9-one                                                | n/a      | Iridiod          | <i>Gardenia jasminoides</i> J. Ellis          | Rubiaceae     | Flowers | [30] |
| <b>33</b> <sup>a, c</sup> | (4S,4aR,7aR)-7-(hydroxymethyl)-1-oxo-3H,4H,4aH,5H,7aH-cyclopenta[c]pyran-4-yl acetate                                                         | n/a      | Iridiod          | <i>G. jasminoides</i> J. Ellis                | Rubiaceae     | Flowers | [30] |
| <b>34</b> <sup>a, c</sup> | (4R,4aR,7aR)-7-(hydroxymethyl)-1-oxo-3H,4H,4aH,5H,7aH-cyclopenta[c]pyran-4-yl acetate                                                         | n/a      | Iridiod          | <i>G. jasminoides</i> J. Ellis                | Rubiaceae     | Flowers | [30] |
| <b>35</b> <sup>a, c</sup> | (5R)-5-(4-((1S,5R)-1-hydroxy-4-oxo-5-[(3E)-2-oxopent-3-en-1-yl]-cyclopent-2-en-1-yl)butyl)dihydrofuran-2(3H)-one                              | n/a      | Chromomoric acid | <i>Tectona philippinensis</i> Benth & Hook.f. | Lamiaceae     | Leaves  | [31] |
| <b>36</b> <sup>a, c</sup> | (5R)-5-(4-((1S,5E)-5-[(2S,3S)-3-ethyloxiran-2-yl]methylidene)-1-hydroxy-4-oxocyclopent-2-en-1-yl)butyl)dihydrofuran-2(3H)-one                 | n/a      | Chromomoric acid | <i>T. philippinensis</i> Benth & Hook.f.      | Lamiaceae     | Leaves  | [31] |
| <b>37</b> <sup>a, c</sup> | (5R)-5-(4-((1S,5R)-1-hydroxy-5-[(2R,3E)-2-hydroxypent-3-en-1-yl]-4-oxocyclopent-2-en-1-yl)butyl)dihydrofuran-2(3H)-one                        | n/a      | Chromomoric acid | <i>T. philippinensis</i> Benth & Hook.f.      | Lamiaceae     | Leaves  | [31] |
| <b>38</b> <sup>a, c</sup> | (5R)-5-(4-((1S,5R)-1-hydroxy-5-[(2S,3E)-2-hydroxypent-3-en-1-yl]-4-oxocyclopent-2-en-1-yl)butyl)dihydrofuran-2(3H)-one                        | n/a      | Chromomoric acid | <i>T. philippinensis</i> Benth & Hook.f.      | Lamiaceae     | Leaves  | [31] |
| <b>39</b> <sup>a, c</sup> | 11,12,12a-nonahydrocyclopentacycloundecene                                                                                                    | n/a      | Sesquiterpene    | <i>Artemisia indica</i> Willd.                | Asteraceae    | Leaves  | [32] |
| <b>40</b> <sup>a, c</sup> | (1S,5R,6R)-3-(hydroxymethyl)-6-isopropyl-5-[[[(2Z)-2-methylbut-2-enoyl]oxy]-2-oxocyclohex-3-en-1-yl (2R,3R)-2,3-dimethyloxirane-2-carboxylate | n/a      | Carvotanacetone  | <i>Sphaeranthus africanus</i> L.              | Asteraceae    | Leaves  | [33] |
| <b>41</b> <sup>a, c</sup> | (1S,5R,6R)-3-(hydroxymethyl)-6-isopropyl-5-[[[(2Z)-2-methylbut-2-enoyl]oxy]-2-oxocyclohex-3-en-1-yl (2Z)-2-methylbut-2-enoate                 | n/a      | Carvotanacetone  | <i>S. africanus</i> L.                        | Asteraceae    | Leaves  | [33] |
| <b>42</b> <sup>a, c</sup> | (1R,5S,6R)-5-[[[(2R)-2-hydroxy-2-methylbutanoyl]oxy]-3-(hydroxymethyl)-6-isopropyl-4-oxocyclohex-2-en-1-yl (2Z)-2-methylbut-2-enoate          | n/a      | Carvotanacetone  | <i>S. africanus</i> L.                        | Asteraceae    | Leaves  | [33] |
| <b>43</b> <sup>a, c</sup> | (1R,5S,6R)-5-[[[(2S)-2-hydroxy-2-methylbutanoyl]oxy]-3-(hydroxymethyl)-6-isopropyl-4-oxocyclohex-2-en-1-yl (2Z)-2-methylbut-2-enoate          | n/a      | Carvotanacetone  | <i>S. africanus</i> L.                        | Asteraceae    | Leaves  | [33] |
| <b>44</b> <sup>c</sup>    | germanicol caffeoyl ester                                                                                                                     | 53248580 | Triterpene       | <i>Barringtonia asiatica</i> (L.) Kurz        | Lecythidaceae | Leaves  | [34] |
| <b>45</b> <sup>a, c</sup> | Camelliagenone                                                                                                                                | 53248544 | Triterpene       | <i>B. asiatica</i> (L.) Kurz                  | Lecythidaceae | Leaves  | [34] |
| <b>46</b> <sup>c</sup>    | Retusenol                                                                                                                                     | n/a      | Triterpene       | <i>Atalantia retusa</i> Merr.                 | Rutaceae      | Leaves  | [35] |
| <b>47</b> <sup>c</sup>    | (3 $\alpha$ ,11 $\beta$ )-11-hydroxyolean-12-en-3-yl palmitate                                                                                | n/a      | Triterpene       | <i>B. asiatica</i> (L.) Kurz                  | Lecythidaceae | Bark    | [36] |
| <b>48</b> <sup>a, c</sup> | (1R)-8-isopropyl-4-methoxy-1-methyltricyclo[6.2.2.0 <sup>2,7</sup> ]dodeca-4,9-diene-3,6-dione                                                | n/a      | Sesquiterpene    | <i>Cinnamomum cebuense</i> Kosterm            | Lauraceae     | Bark    | [37] |

|                           |                                                             |     |                              |                                                                                                                 |               |                    |      |
|---------------------------|-------------------------------------------------------------|-----|------------------------------|-----------------------------------------------------------------------------------------------------------------|---------------|--------------------|------|
| <b>49</b> <sup>a, c</sup> | 3-[(5Z)-5-methylhept-5-en-2-yl]-6-methylidenecyclohex-1-ene | n/a | Monoterpene                  | <i>C. cebuense</i> Kosterm                                                                                      | Lauraceae     | Leaves             | [37] |
| <b>50</b> <sup>c</sup>    | Dysoxylumglabretol A                                        | n/a | Glabretal-type triterpenoids | <i>Didymocheton mollissimus</i> (Spreng.) Mabb.<br>(syn. <i>Dysoxylum mollissimum</i> (Spreng.) Blume ex G.Don) | Meliaceae     | Leaves             | [38] |
| <b>51</b> <sup>c</sup>    | Dysoxylumglabretol B                                        | n/a | Glabretal-type triterpenoids | <i>D. mollissimus</i> (Spreng.) Mabb.                                                                           | Meliaceae     | Leaves             | [38] |
| <b>52</b> <sup>c</sup>    | Asperol A                                                   | n/a | Triterpene                   | <i>Canarium asperum</i> Benth. in Hook.f.                                                                       | Burseraceae   | Resins of the bark | [39] |
| <b>53</b> <sup>c</sup>    | Asperol B                                                   | n/a | Triterpene                   | <i>C. asperum</i> Benth. in Hook.f.                                                                             | Burseraceae   | Resins of the bark | [39] |
| <b>54</b> <sup>a, c</sup> | Oppositifolone                                              | n/a | Triterpene                   | <i>Glinus oppositifolius</i> (L.) A.DC.                                                                         | Molluginaceae | Leaves             | [40] |
| <b>55</b> <sup>a, c</sup> | 2 $\alpha$ ,18-dihydroxy-isopimara-7,15-diene               | n/a | Diterpene                    | <i>Cycas sancti-lasallei</i> Agoo & Madulid                                                                     | Cycadaceae    | Leaflet            | [41] |
| <b>56</b> <sup>a, c</sup> | Wadeiol                                                     | n/a | Isoflavonoid phtoalexin      | <i>Cycas wadei</i> Merr.                                                                                        | Cycadaceae    | Roots              | [42] |
| <b>57</b> <sup>c</sup>    | Selin-4(5)-en-1 $\beta$ ,11-diol                            | n/a | Sesquiterpene alcohol        | <i>C. wadei</i> Merr.                                                                                           | Cycadeceae    | Roots              | [42] |
| <b>58</b> <sup>a, c</sup> | Grandiflorolide                                             | n/a | Sesquiterpene lactone        | <i>Chrysanthemum x morifolium</i> (Ramat.) Hemsl.<br>(syn. <i>Dendranthema x grandiflorum</i> (Ramat.) Kitam)   | Asteraceae    | Flower             | [43] |

<sup>a</sup> Compounds that passed the drug-likeness screening (Lipinski's Rule of Five); <sup>b</sup> classified as novel compounds; <sup>c</sup> classified as new compounds

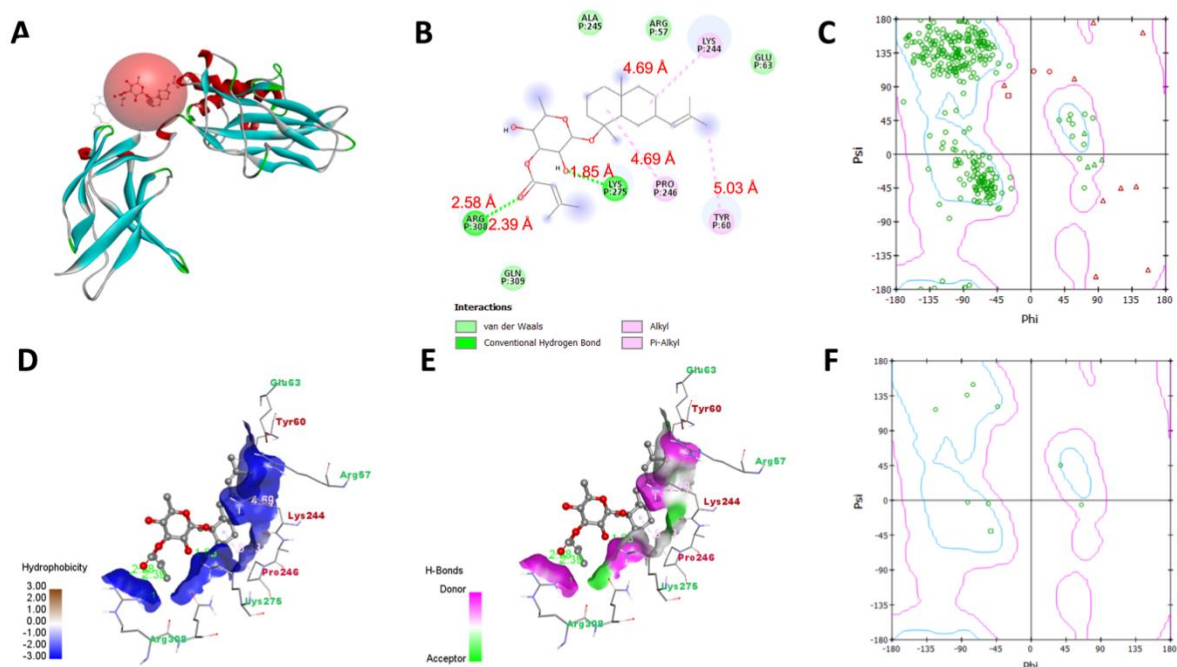

**Figure S1.** Binding interaction of p50 and Compound 11 (A) Ligand binding sphere and p50 protein, (B) Two-dimensional display of the interaction, (C) Ramachandran plot of p50, (D) Hydrophobic property of binding pocket, (E) H-bond property of binding pocket, (F) Ramachandran plot of ligand-interaction amino acid residues

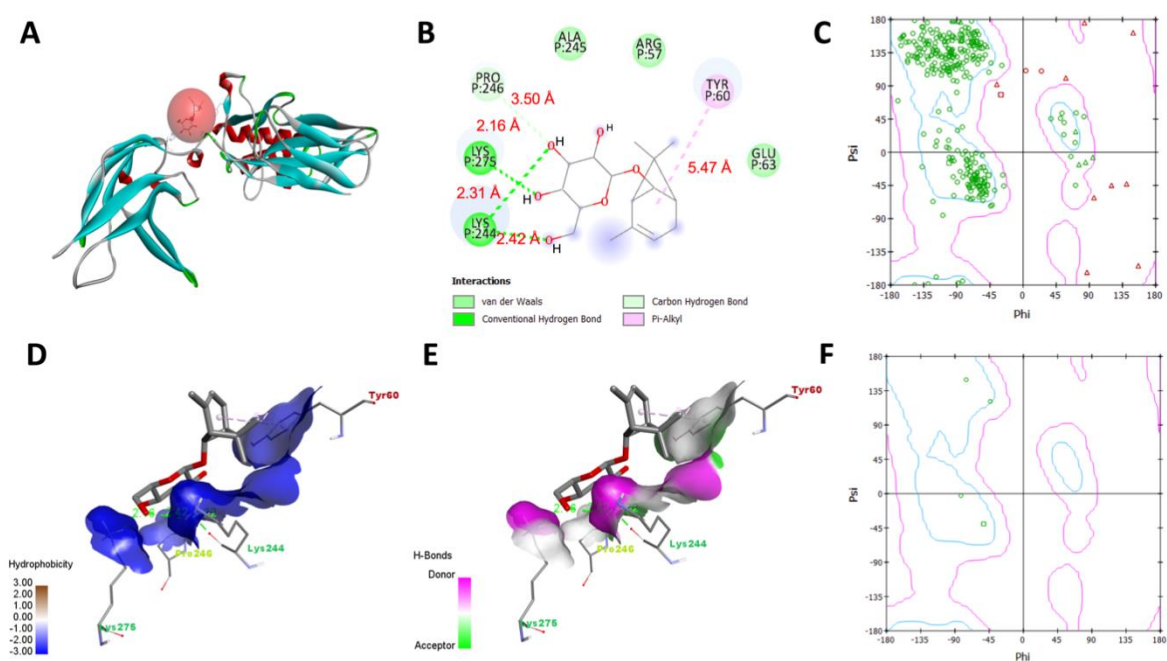

**Figure S2.** Binding interaction of p50 and Compound 14 (A) Ligand binding sphere and p50 protein, (B) Two-dimensional display of the interaction, (C) Ramachandran plot of p50, (D) Hydrophobic property of binding pocket, (E) H-bond property of binding pocket, (F) Ramachandran plot of ligand-interaction amino acid residues

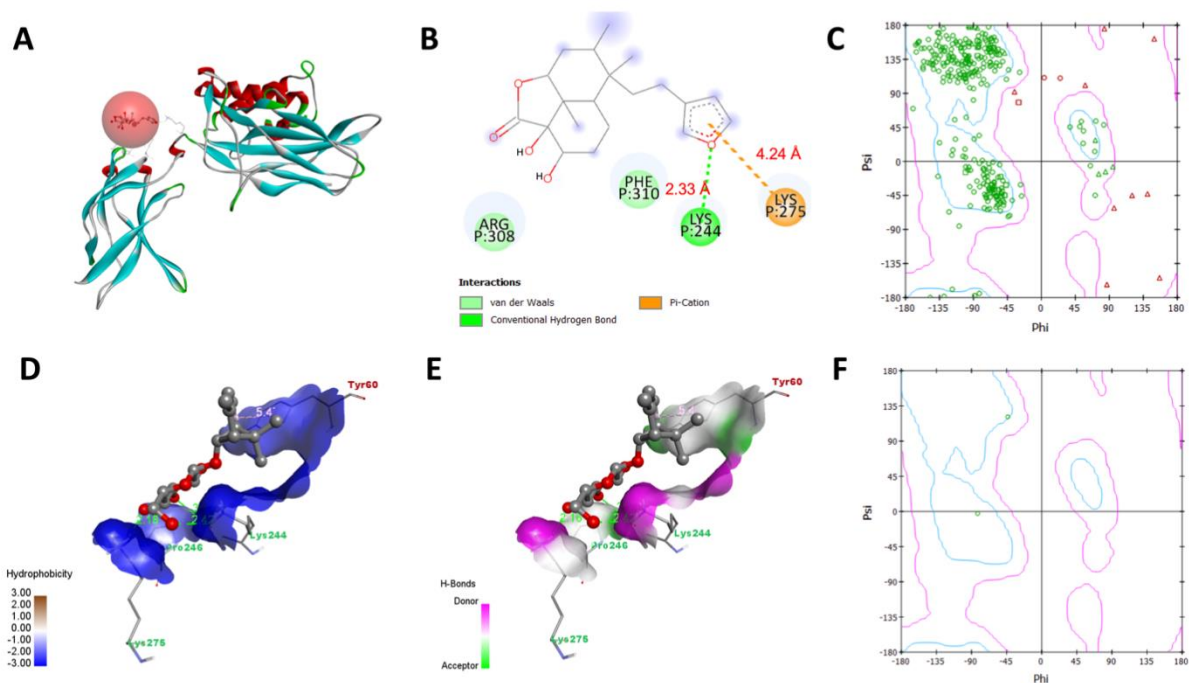

**Figure S3.** Binding interaction of p50 and Compound **16** (A)Ligand binding sphere and p50 protein, (B) Two-dimensional display of the interaction, (C) Ramachandran plot of p50, (D) Hydrophobic property of binding pocket, (E) H-bond property of binding pocket, (F) Ramachandran plot of ligand-interaction amino acid residues

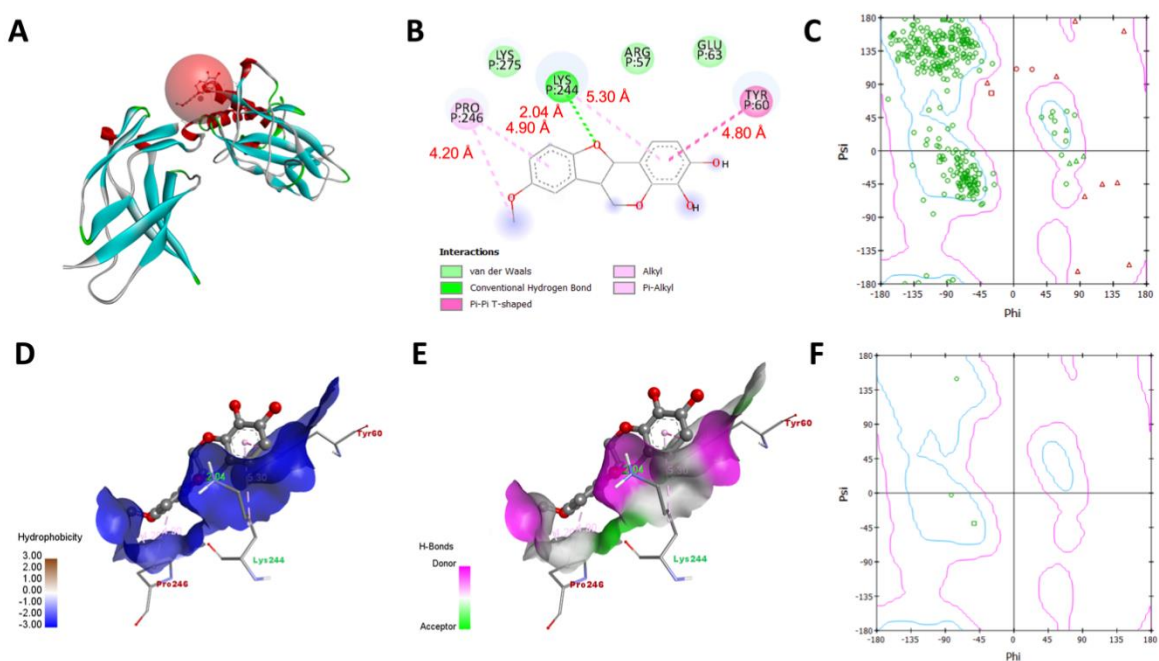

**Figure S4.** Binding interaction of p50 and Compound **56** (A)Ligand binding sphere and p50 protein, (B) Two-dimensional display of the interaction, (C) Ramachandran plot of p50, (D) Hydrophobic property of binding pocket, (E) H-bond property of binding pocket, (F) Ramachandran plot of ligand-interaction amino acid residues



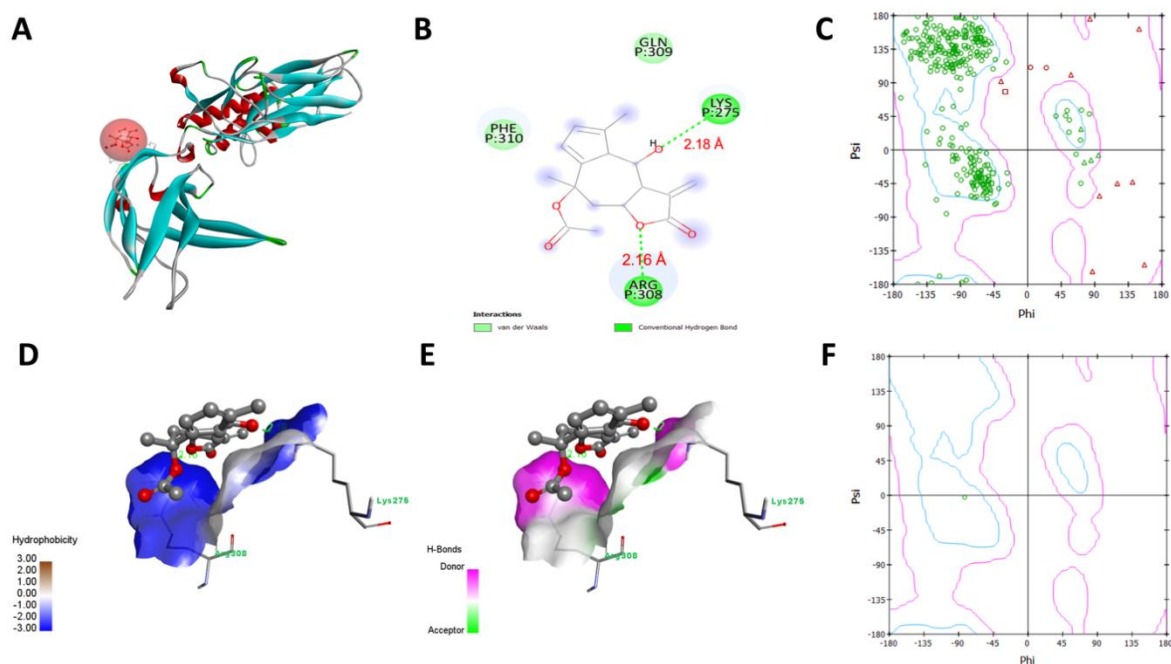

**Figure S5.** Binding interaction of p53 and Compound **58** (A)Ligand binding sphere and p53 protein, (B) Two-dimensional display of the interaction, (C) Ramachandran plot of p53, (D) Hydrophobic property of binding pocket, (E) H-bond property of binding pocket, (F) Ramachandran plot of ligand-interaction amino acid residues

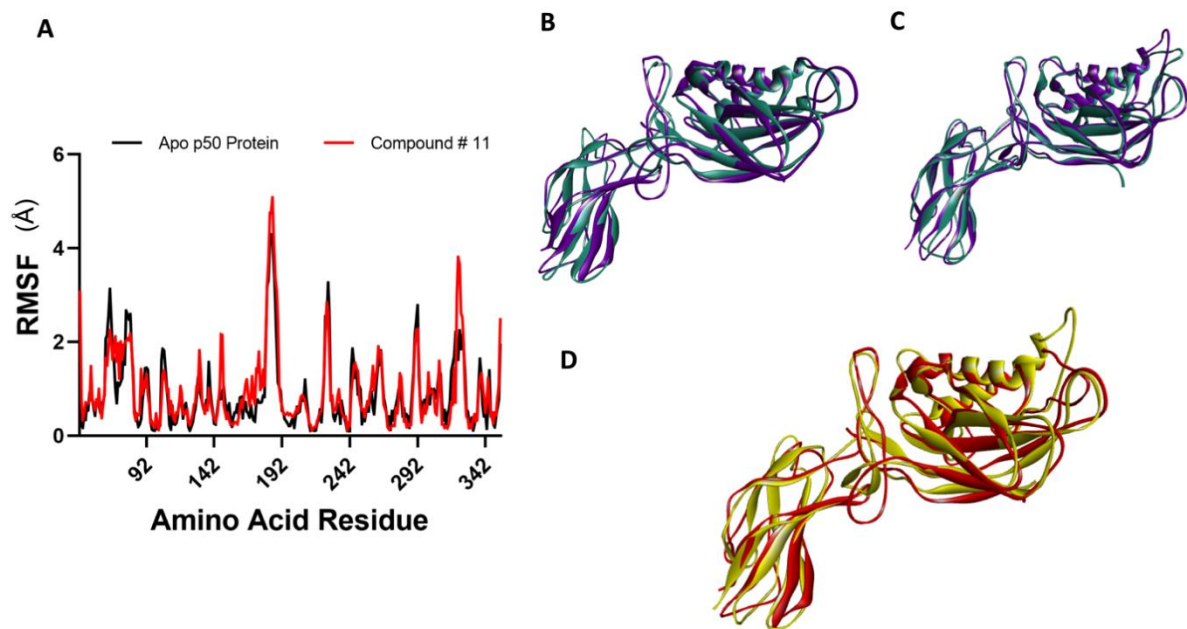

**Figure S6.** Molecular simulation of of p53 – Compound **11** complex: (A) RMSF values of amino acid residues of Apoprotein vs. protein-ligand (Compound **11**) complex and control. Three-dimensional models of (B) Changes in Apoprotein in 0ns (*Teal*) and 10ns (*Violet*), (C) Changes in Protein-ligand (Compound **11**) complex in 0ns (*Teal*) and 10ns (*Violet*), and (D) overlap model of Apo-protein (*Red*) vs protein-ligand (*Yellow*) complex (at 10ns)

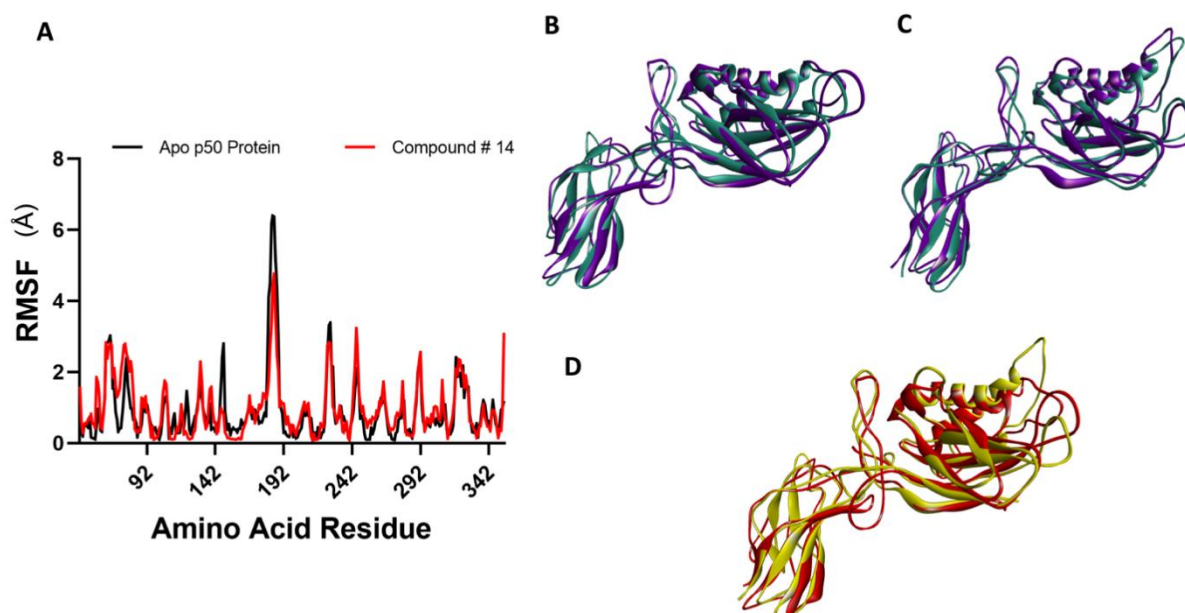

**Figure S7.** Molecular simulation of of p50 – Compound **14** complex: (A) RMSF values of amino acid residues of Apoprotein vs. protein-ligand (Compound **14**) complex and control. Three-dimensional models of (B) Changes in Apoprotein in 0ns (*Teal*) and 10ns (*Violet*), (C) Changes in Protein-ligand (Compound **14**) complex in 0ns (*Teal*) and 10ns (*Violet*), and (D) overlap model of Apoprotein (*Red*) vs protein-ligand (*Yellow*) complex (at 10ns)

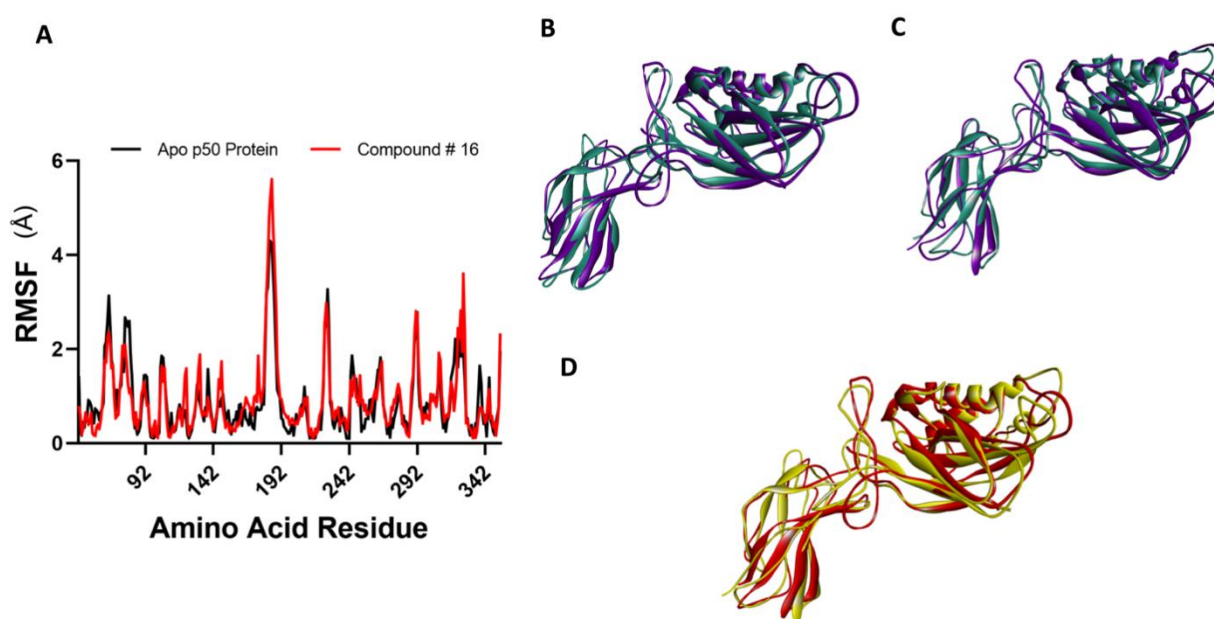

**Figure S8.** Molecular simulation of of p50 – Compound **16** complex: (A) RMSF values of amino acid residues of Apoprotein vs. protein-ligand (Compound **16**) complex and control. Three-dimensional models of (B) Changes in Apoprotein in 0ns (*Teal*) and 10ns (*Violet*), (C) Changes in Protein-ligand (Compound **16**) complex in 0ns (*Teal*) and 10ns (*Violet*), and (D) overlap model of Apoprotein (*Red*) vs protein-ligand (*Yellow*) complex (at 10ns)

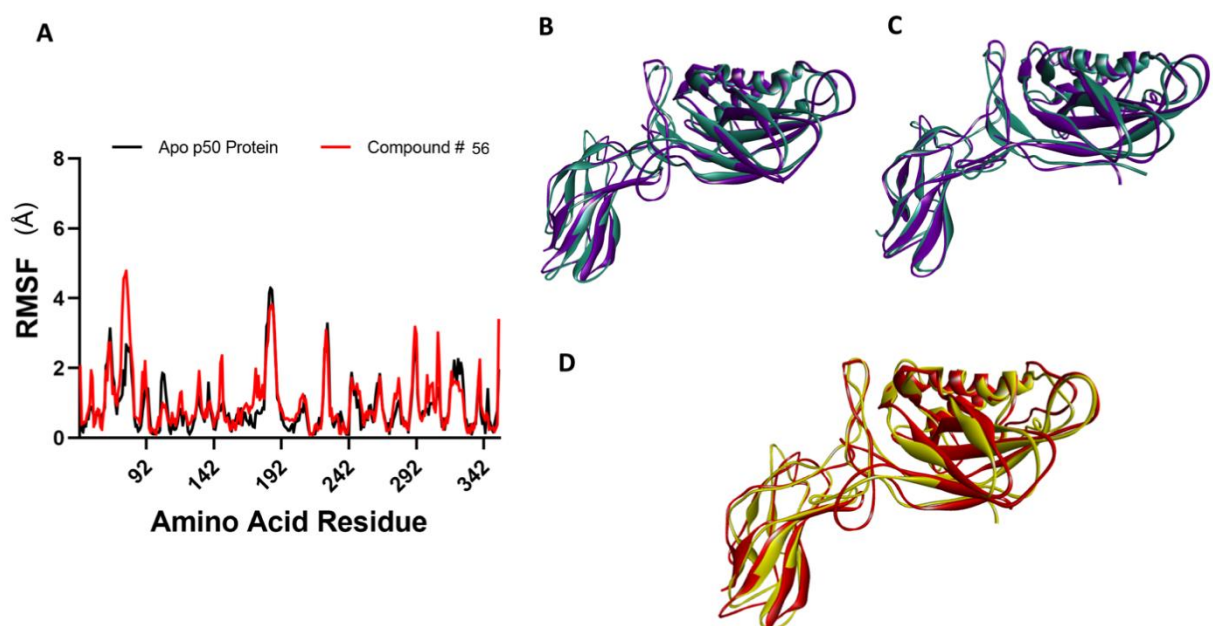

**Figure S9.** Molecular simulation of of p50 – Compound **56** complex: (A) RMSF values of Apoprotein vs. protein-ligand (Compound **56**) complex and control amino acid residues. Three-dimensional models of (B) Changes in Apoprotein in 0ns (*Teal*) and 10ns (*Violet*), (C) Changes in Protein-ligand (Compound **56**) complex in 0ns (*Teal*) and 10ns (*Violet*), and (D) overlap model of Apoprotein (*Red*) vs protein-ligand (*Yellow*) complex (at 10ns)

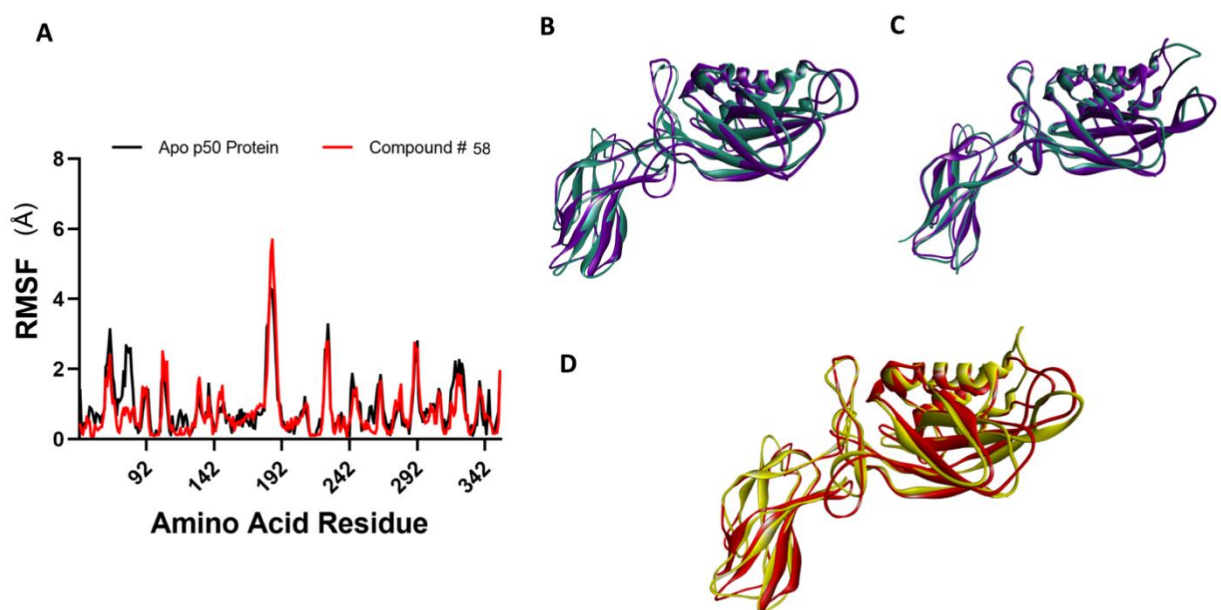

**Figure S10.** Molecular simulation of of p50 – Compound **58** complex: (A) RMSF values of amino acid residues of Apoprotein vs. protein-ligand (Compound **58**) complex and control. Three-dimensional models of (B) Changes in Apoprotein in 0ns (*Teal*) and 10ns (*Violet*), (C) Changes in Protein-ligand (Compound **58**) complex in 0ns (*Teal*) and 10ns (*Violet*), and (D) overlap model of Apoprotein (*Red*) vs protein-ligand (*Yellow*) complex (at 10ns)

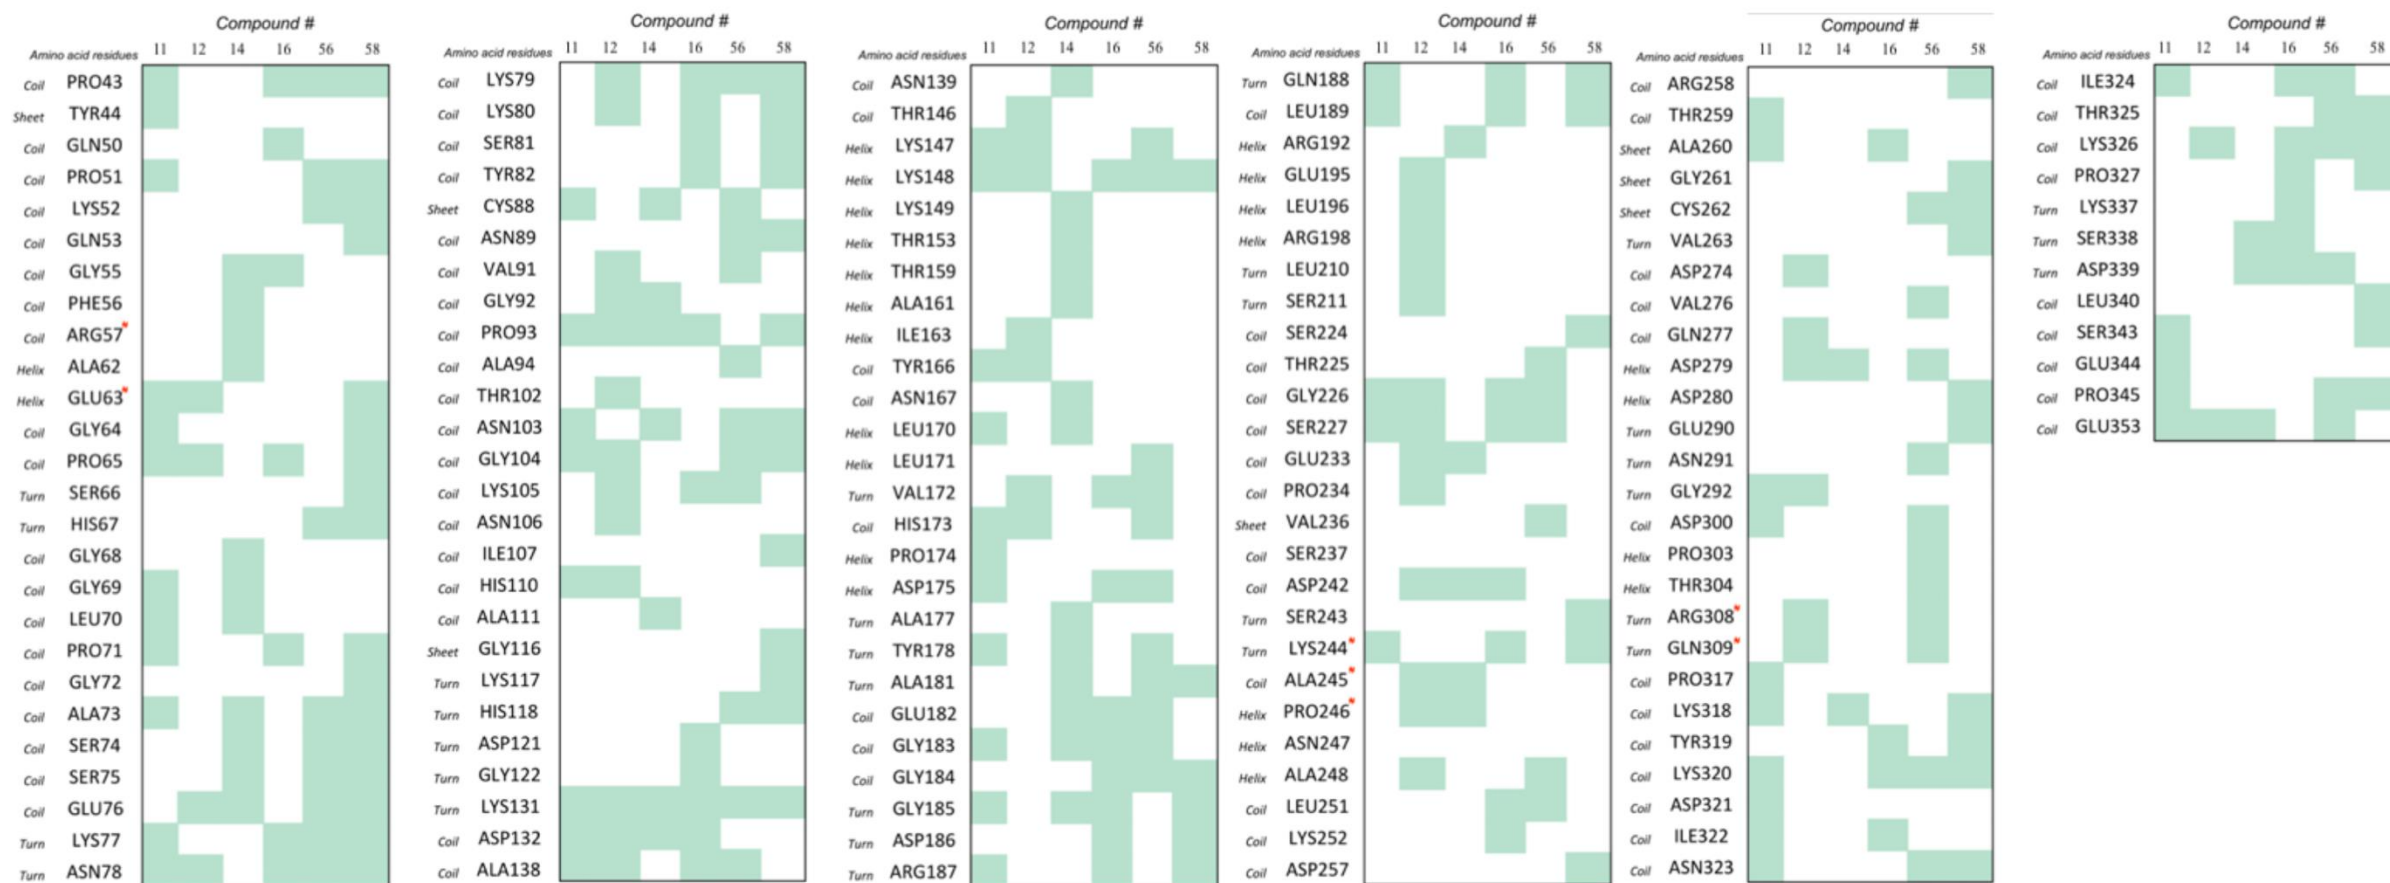

\* Amino acid residues interacting with the ligand during binding

Figure S11. Amino acid residues with significant vibration motion during the simulation

**Table S2.** Evolution of non-covalent bonding interaction between the protein and ligand in 10 ns.

| Cmp | 0 ns        |                            | 2 ns        |                            | 4 ns        |               | 6 ns        |               | 8 ns        |                                      | 10 ns       |                            |
|-----|-------------|----------------------------|-------------|----------------------------|-------------|---------------|-------------|---------------|-------------|--------------------------------------|-------------|----------------------------|
|     | Amino acids | Type                       | Amino acids | Type                       | Amino acids | Type          | Amino acids | Type          | Amino acids | Type                                 | Amino acids | Type                       |
| 11  | LYS275      | Conventional Hydrogen Bond | ARG308      | Conventional Hydrogen Bond | LYS244      | Alkyl         | PHE58       | Pi-Alkyl      | LYS244      | Alkyl                                | LYS244      | Alkyl                      |
|     | ARG308      | Conventional Hydrogen Bond | LYS244      | Alkyl                      | ALA245      | Alkyl         | ARG59       | Van der Waals | HIS307      | Van der Waals                        | TYR60       | Pi-Alkyl                   |
|     | LYS244      | Alkyl                      | ALA248      | Alkyl                      | ALA248      | Alkyl         | TYR60       | Van der Waals | GLN277      | Van der Waals                        | ALA62       | Van der Waals              |
|     | PRO246      | Alkyl                      | TYR60       | Pi-Alkyl                   | TYR60       | Van der Waals | ALA62       | Van der Waals | LYS275      | Van der Waals                        | GLU63       | Van der Waals              |
|     | TYR60       | Pi-Alkyl                   | GLN277      | Van der Waals              | GLU63       | Van der Waals | PRO65       | Van der Waals | ALA248      | Van der Waals                        | ALA245      | Van der Waals              |
|     | ARG57       | Van der Waals              | PRO246      | Van der Waals              | SER243      | Van der Waals | LYS244      | Van der Waals | ASN247      | Van der Waals                        | PRO246      | Van der Waals              |
|     | GLU63       | Van der Waals              | ALA245      | Van der Waals              | PRO246      | Van der Waals | ALA245      | Van der Waals | LYS244      | Van der Waals                        | ALA248      | Van der Waals              |
|     | ALA245      | Van der Waals              | PHE58       | Van der Waals              | VAL276      | Van der Waals | LYS275      | Van der Waals | ALA245      | Van der Waals                        | LYS275      | Van der Waals              |
|     | GLN309      | Van der Waals              | ARG59       | Van der Waals              |             |               | LYS278      | Van der Waals | TYR60       | Van der Waals                        | LYS278      | Van der Waals              |
|     |             |                            | ALA62       | Van der Waals              |             |               |             |               |             |                                      | ARG308      | Van der Waals              |
|     |             |                            | GLU63       | Van der Waals              |             |               |             |               |             |                                      | GLN309      | Van der Waals              |
|     |             |                            | GLY64       | Van der Waals              |             |               |             |               |             |                                      |             |                            |
| 12  | LYS275      | Conventional Hydrogen Bond | ARG308      | Alkyl                      | LYS244      | Alkyl         | ARG308      | Alkyl         | ARG308      | Conventional Hydrogen Bond and Alkyl | ARG308      | Conventional Hydrogen Bond |
|     | LYS244      | Alkyl                      | TYR60 -     | Pi-Alkyl                   | ALA245      | Alkyl         | LYS244      | Alkyl         | ALA245      | Alkyl                                | ALA245      | Alkyl                      |
|     | ARG308      | Alkyl                      | LYS244      | Van der Waals              | GLN309      | Van der Waals | ARG59       | Van der Waals | GLN309      | Van der Waals                        | TYR60       | Van der Waals              |
|     | TYR60       | Pi-Alkyl                   | ALA245      | Van der Waals              | GLN277      | Van der Waals | PHE58       | Van der Waals | ASN247      | Van der Waals                        | GLU63       | Van der Waals              |
|     | PHE310      | Pi-Alkyl                   | ASN247      | Van der Waals              | LYS275      | Van der Waals | TYR60       | Van der Waals | PRO246      | Van der Waals                        | LYS244      | Van der Waals              |
|     | GLN309      | Van der Waals              | GLN309      | Van der Waals              | ASN247      | Van der Waals | ALA245      | Van der Waals | LYS244      | Van der Waals                        | PRO246      | Van der Waals              |
|     | PRO246      | Van der Waals              |             |                            | PRO246      | Van der Waals | PRO246      | Van der Waals | GLU63       | Van der Waals                        | ASN247      | Van der Waals              |
|     | ALA245      | Van der Waals              |             |                            | SER243      | Van der Waals | ASN247      | Van der Waals | TYR60       | Van der Waals                        | ALA248      | Van der Waals              |
|     | ARG57       | Van der Waals              |             |                            |             |               | LYS275      | Van der Waals |             |                                      | LYS278      | Van der Waals              |
|     | TYR60       | Van der Waals              |             |                            |             |               | GLN277      | Van der Waals |             |                                      | GLN309      | Van der Waals              |
|     | GLU63       | Van der Waals              |             |                            |             |               | GLN309      | Van der Waals |             |                                      |             |                            |



(Continue Table S2...)

|    |        |                                                 |        |               |        |                            |        |                                         |        |                            |        |                           |
|----|--------|-------------------------------------------------|--------|---------------|--------|----------------------------|--------|-----------------------------------------|--------|----------------------------|--------|---------------------------|
| 14 | LYS244 | Conventional Hydrogen Bond                      | ALA62  | Alkyl         | ARG57  | Van der Waals              | TYR60  | Conventional Hydrogen Bond and Pi-Alkyl | TYR60  | Van der Waals              | TYR60  | Pi-Alkyl                  |
|    | LYS275 | Conventional Hydrogen Bond                      | TYR60  | Pi-Alkyl      | TYR60  | Van der Waals              | LYS275 | Van der Waals                           | ASP242 | Van der Waals              | LYS275 | Van der Waals             |
|    | PRO246 | Carbon Hydrogen Bond                            | PHE58  | Van der Waals | GLU63  |                            | GLU63  |                                         |        |                            | HIS144 | Van der Waals             |
|    | TYR60  | Pi-Alkyl                                        | ARG59  | Van der Waals | LYS244 |                            | ARG59  |                                         |        |                            | GLU63  | Van der Waals             |
|    | GLN309 | Van der Waals                                   | VAL61  | Van der Waals | ASN247 |                            |        |                                         |        |                            | ARG59  | Van der Waals             |
|    | ALA245 | Van der Waals                                   | ALA62  | Van der Waals | LYS275 |                            |        |                                         |        |                            | VAL61  | Van der Waals             |
|    | GLU63  | Van der Waals                                   | GLU63  | Van der Waals |        |                            |        |                                         |        |                            |        |                           |
|    | ARG59  | Van der Waals                                   | GLY64  | Van der Waals |        |                            |        |                                         |        |                            |        |                           |
|    | PHE58  | Van der Waals                                   | ASP242 | Van der Waals |        |                            |        |                                         |        |                            |        |                           |
| 16 | LYS244 | Conventional Hydrogen Bond                      | ALA245 | Pi-Alkyl      | ARG308 | Conventional Hydrogen Bond | LYS275 | Pi-Cation                               | ARG308 | Conventional Hydrogen Bond | ARG308 | Van der Waals             |
|    | LYS275 | Pi-Cation                                       | PRO246 | Pi-Alkyl      | ALA245 | Pi-Alkyl                   | ALA245 | Pi-Alkyl                                | ALA245 | Pi-Alkyl                   | GLN309 | Van der Waals             |
|    | ARG308 | Van der Waals                                   | PHE310 | Van der Waals | PRO246 | Van der Waals              | GLN309 | Van der Waals                           | PRO246 | Van der Waals              | PHE310 | Van der Waals             |
|    | GLN309 | Van der Waals                                   | GLN309 | Van der Waals | HIS307 | Van der Waals              | PHE310 | Van der Waals                           | LYS275 | Van der Waals              | LYS275 | Van der Waals             |
|    | PHE310 | Van der Waals                                   | ARG308 | Van der Waals | GLN309 | Van der Waals              | PRO246 | Van der Waals                           | GLN309 | Van der Waals              | LYS244 | Van der Waals             |
|    |        |                                                 | HIS307 | Van der Waals | PHE310 | Van der Waals              |        |                                         | PHE310 | Van der Waals              | ALA245 | Van der Waals             |
| 56 | LYS244 | Pi-Alkyl, Conventional Hydrogen Bond, and Alkyl | GLN277 | Van der Waals | ALA62  | Pi-Alkyl                   | ALA62  | Pi-Alkyl and Conventional Hydrogen Bond | ALA245 | Pi-Alkyl and Alkyl         | LYS244 | Pi-Alkyl and Pi-Lone Pair |
|    | PRO246 | Pi-Alkyl and Alkyl                              | LYS275 | Van der Waals | TYR60  | Pi-Alkyl                   | ALA245 | Pi-Alkyl and Alkyl                      | PRO246 | Pi-Alkyl                   | LYS275 | Van der Waals             |
|    | TYR60  | Pi-Pi T-shaped                                  | LYS244 | Van der Waals | VAL61  | Van der Waals              | LYS275 | Van der Waals                           | TYR60  | Pi-Alkyl                   | GLN277 | Van der Waals             |
|    | GLU63  | Van der Waals                                   | ALA245 | Van der Waals | GLU63  | Van der Waals              | PRO246 | Van der Waals                           | PHE58  | Van der Waals              | ASN247 | Van der Waals             |
|    | ALA245 | Van der Waals                                   | SER243 | Van der Waals | GLY64  | Van der Waals              | LYS244 | Van der Waals                           | ARG59  | Van der Waals              | PRO246 | Van der Waals             |
|    | LYS275 | Van der Waals                                   | ASN247 | Van der Waals | SER66  | Van der Waals              | SER243 | Van der Waals                           | GLU63  | Van der Waals              | ALA245 | Van der Waals             |
|    | GLN309 | Van der Waals                                   | ALA62  | Van der Waals | SER243 | Van der Waals              | LEU210 | Van der Waals                           | ASN247 | Van der Waals              | SER243 | Van der Waals             |
|    | ARG57  | Van der Waals                                   | GLU63  | Van der Waals | LYS244 | Van der Waals              | TYR60  | Van der Waals                           | LYS275 | Van der Waals              | GLU63  | Van der Waals             |
|    | ARG59  | Van der Waals                                   | TYR60  | Van der Waals | ALA245 | Van der Waals              | VAL61  | Van der Waals                           |        |                            | ALA62  | Van der Waals             |
|    |        |                                                 | PHE58  | Van der Waals | LYS275 | Van der Waals              | GLU63  | Van der Waals                           |        |                            | TYR60  | Van der Waals             |
|    |        |                                                 |        |               |        |                            | GLY64  | Van der Waals                           |        |                            |        |                           |
|    |        |                                                 |        |               |        |                            | PRO65  | Van der Waals                           |        |                            |        |                           |

(Continue Table S2...)

|    |          |                            |          |                                                             |        |               |        |               |        |               |        |               |
|----|----------|----------------------------|----------|-------------------------------------------------------------|--------|---------------|--------|---------------|--------|---------------|--------|---------------|
| 58 | LYS275   | Conventional Hydrogen Bond | ARG308 - | Alkyl, Conventional Hydrogen Bond, and Carbon Hydrogen Bond | LYS275 | Alkyl         | HIS307 | Van der Waals | ASN247 | Van der Waals | HIS307 | Van der Waals |
|    | ARG308   | Conventional Hydrogen Bond | PHE310   | Van der Waals                                               | ARG308 | Van der Waals | ARG308 | Van der Waals | LYS275 | Van der Waals | ARG308 | Van der Waals |
|    | PHE310 - | Pi-Alkyl                   | GLN309   | Van der Waals                                               | GLN309 | Van der Waals | GLN309 | Van der Waals | ARG308 | Van der Waals | GLN309 | Van der Waals |
|    | HIS307   | Van der Waals              | LYS275   | Van der Waals                                               | PHE310 | Van der Waals | PHE310 | Van der Waals | GLN309 | Van der Waals | PHE310 | Van der Waals |
|    | GLN309   | Van der Waals              |          |                                                             |        |               | LYS275 | Van der Waals | PHE310 | Van der Waals | LYS275 | Van der Waals |
